# Supplementary material for: Impact of Donation Physicians on Deceased Organ Donation: A Systematic Review
Source: Research Square preprint supplement (doi:10.21203/rs.3.rs-200397/v1), 2021-02-17
Supplement: Supplementary file 1 [file 8dda7b751955a02c89a8771c.docx]

**Additional file 5**


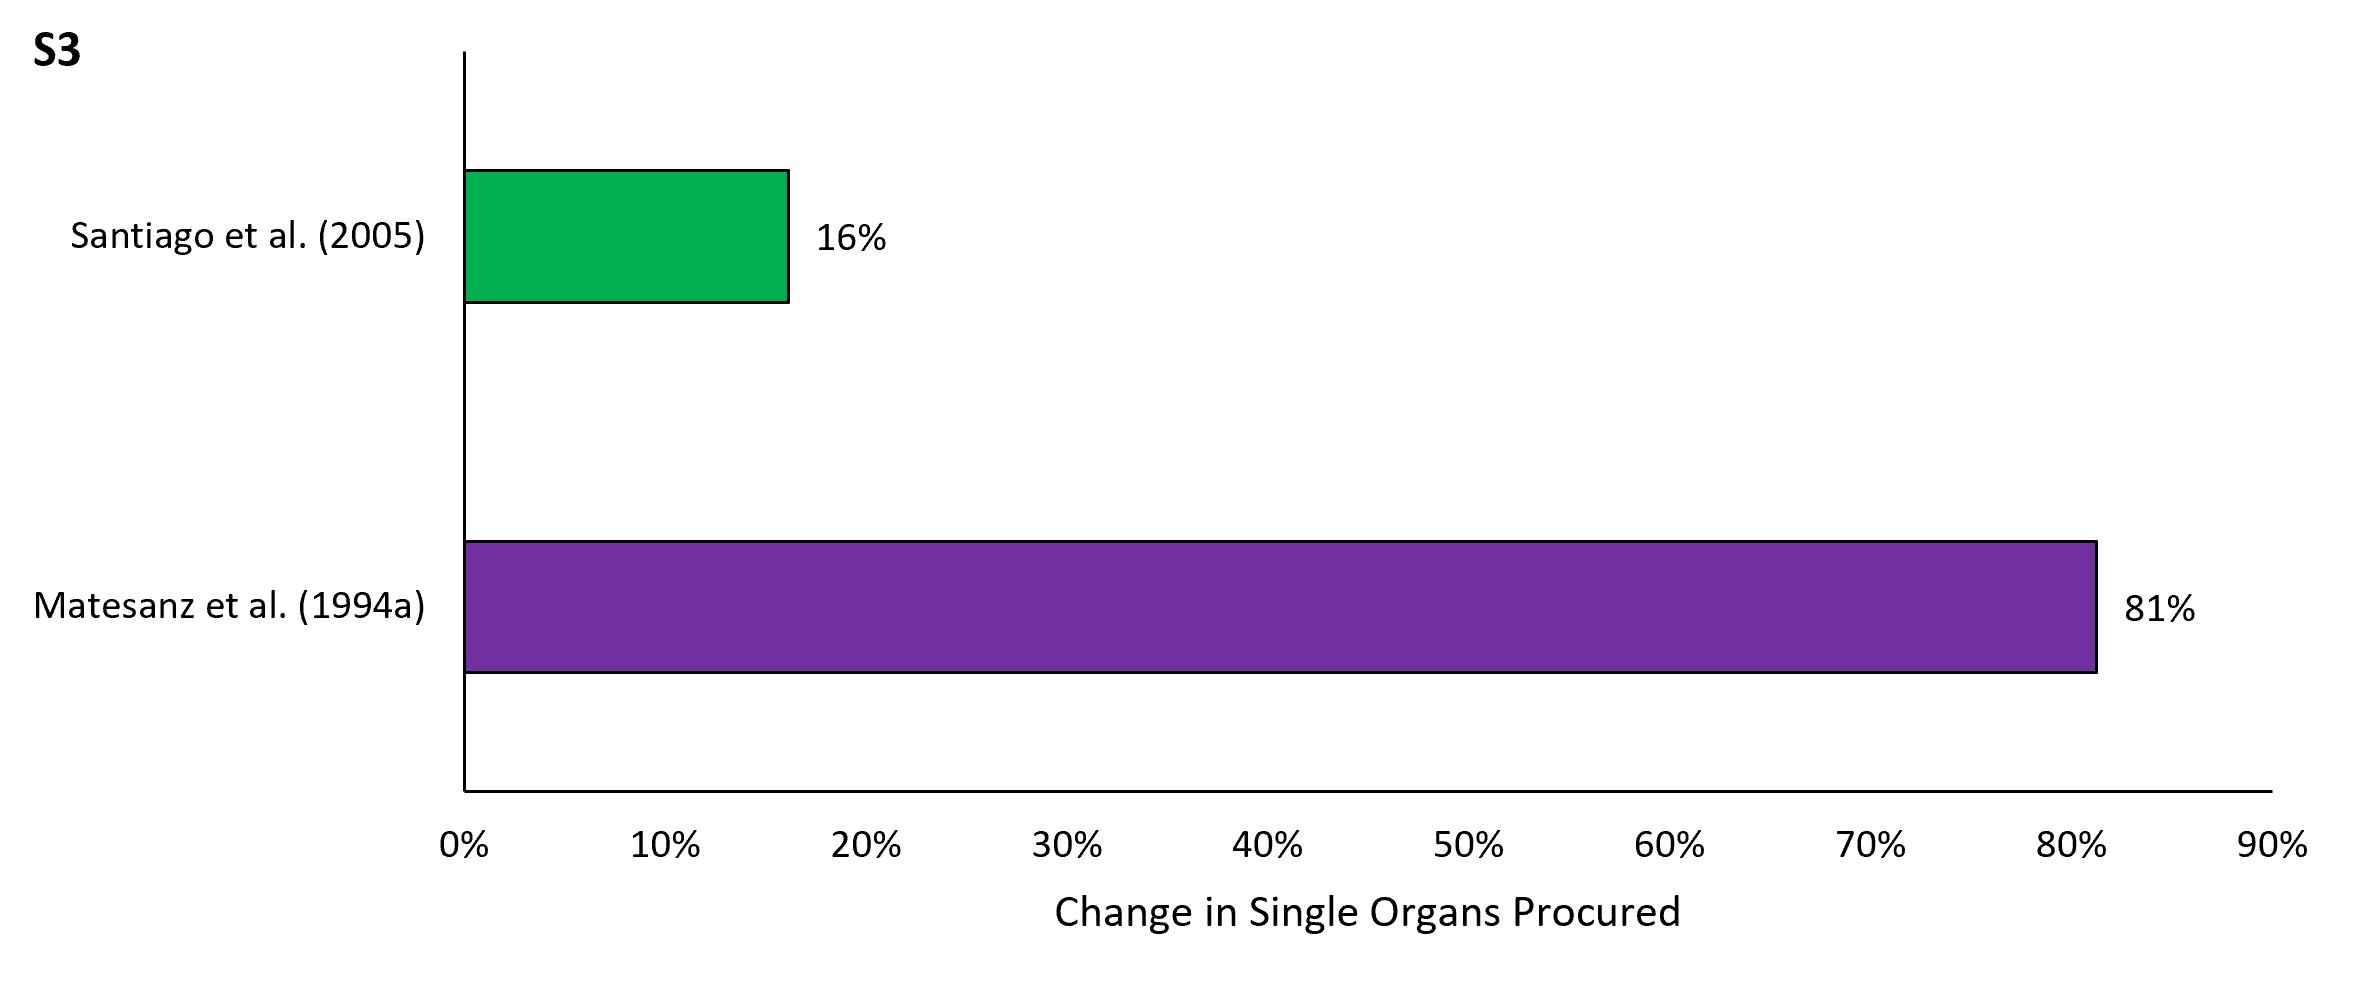


Figure S3. Percent change in single organs procured for before-and-after studies.
